# Supplementary material for: Review of The Koran: A Very Short Introduction
Source: Royal Society of Chemistry journal article supplement (doi:10.1039/c6nr04100k), 2001-09-01
Supplement: c6nr04100k1.pdf [file c6nr04100k1.pdf]

## Supporting Information

### Building robust architectures of carbon wrapped transition metal nanoparticles toward high-catalytic enhancement of $2\text{LiBH}_4\text{-MgH}_2$ system for hydrogen storage cycling performances

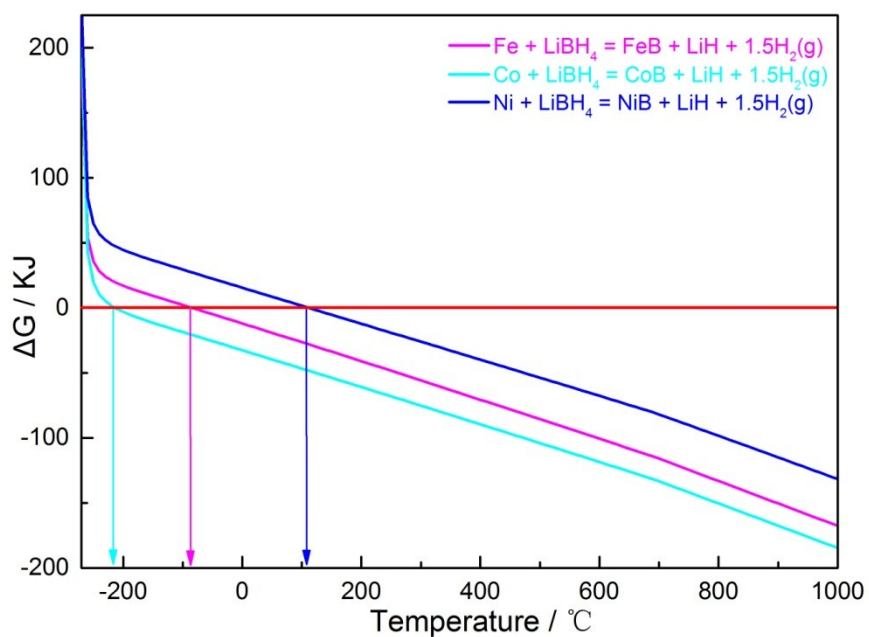

Figure S1 thermodynamic data of reactions between TM and  $\text{LiBH}_4$ .

## Supporting Information

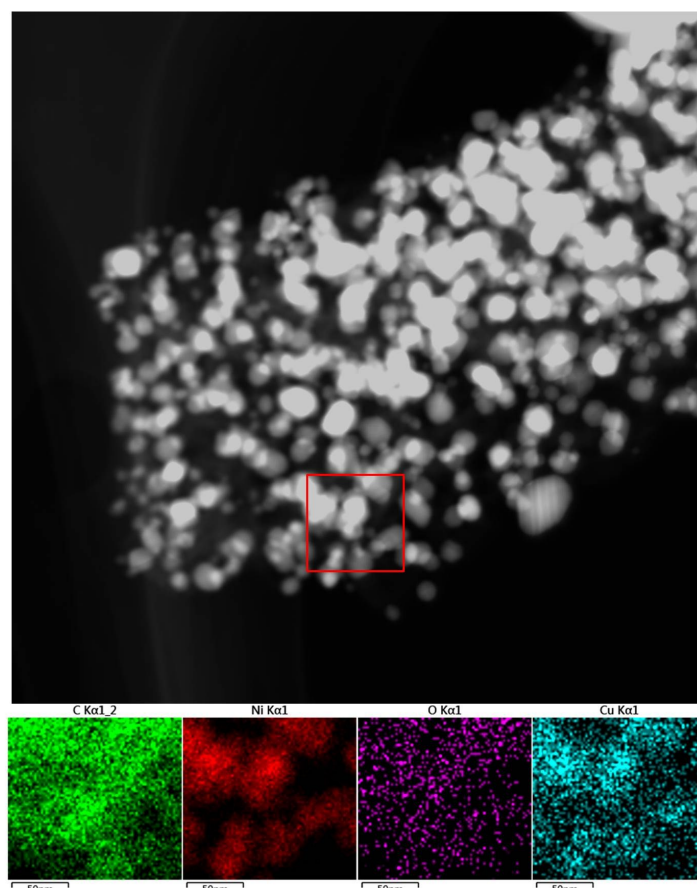

**Figure S2** STEM photograph of as-synthesized Ni/C and EDX of mapping data.

It should be mentioned that the Cu and O are derived from the background of copper grid which was used to support the sample during the TEM and EDX mapping measurement.

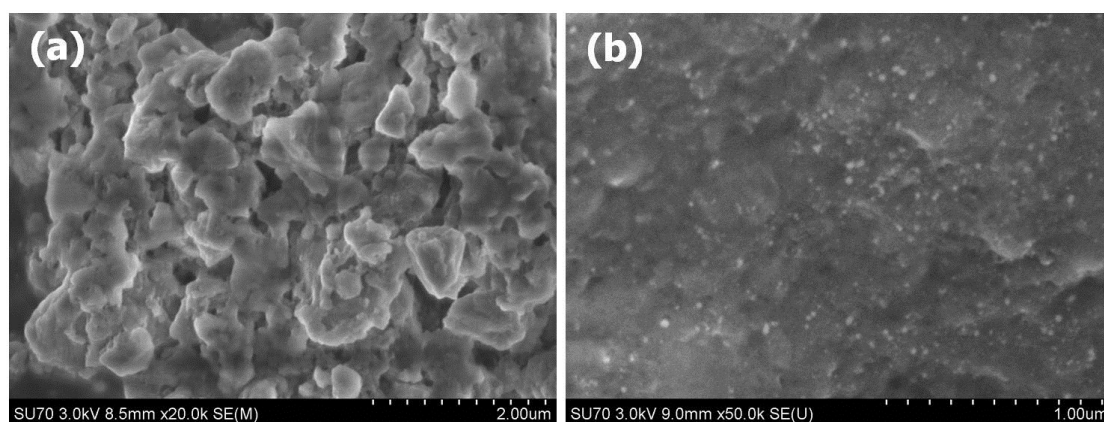

**Figure S3** SEM photograph of as-milled  $2\text{LiBH}_4\text{-MgH}_2$  (a) and  $2\text{LiBH}_4\text{-MgH}_2\text{-Ni/C}$  (b).

## Supporting Information

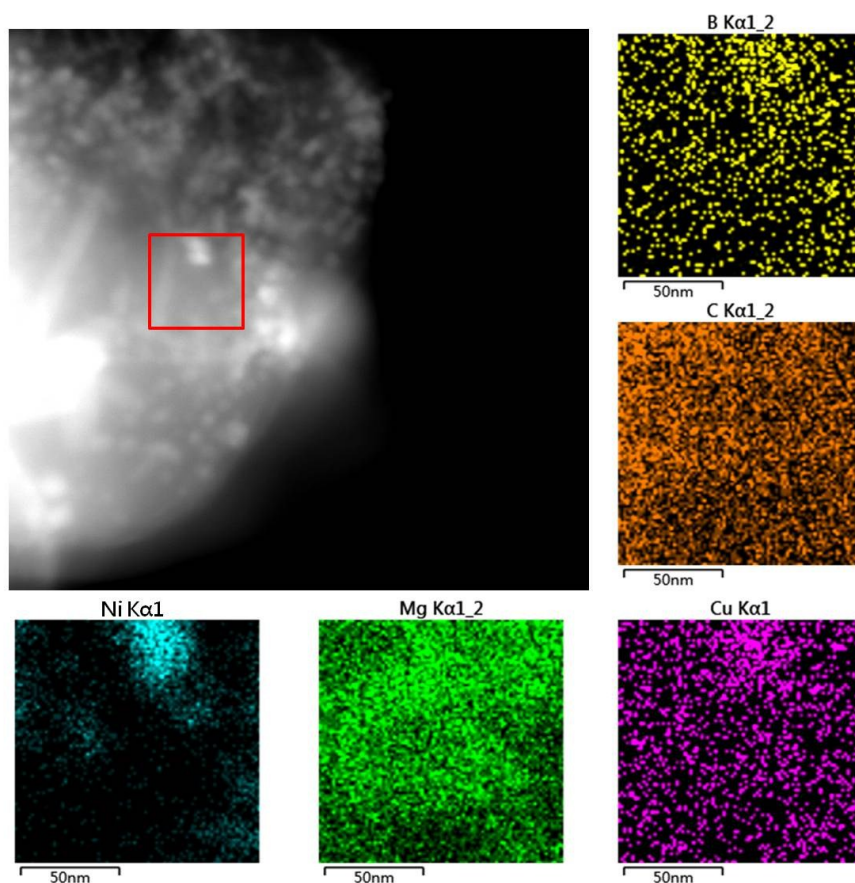

**Figure S4** STEM photograph of as-milled 2LiBH<sub>4</sub>-MgH<sub>2</sub>-Ni/C and EDX of mapping data.

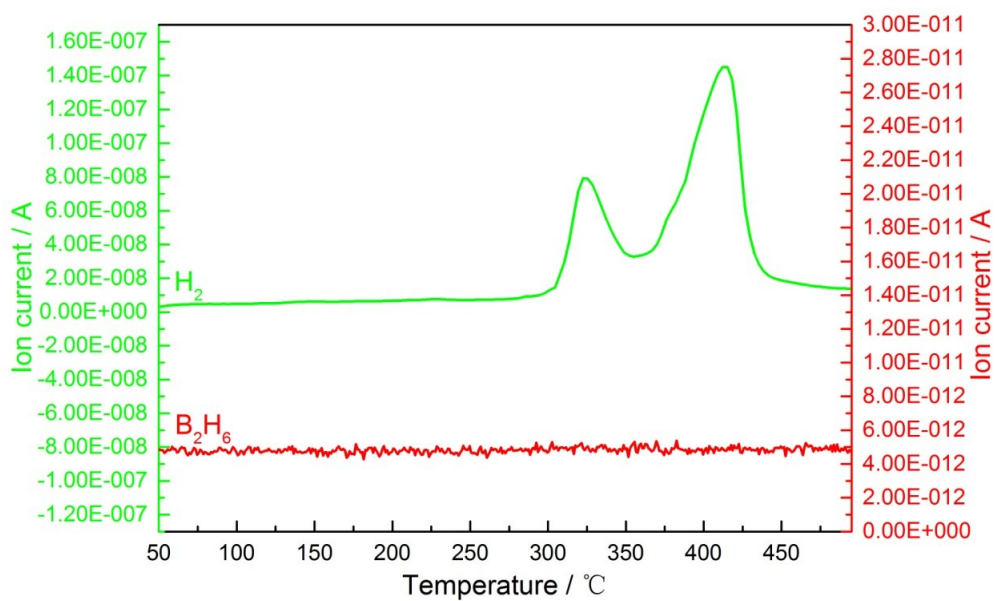

**Figure S5** MS profiles of H<sub>2</sub> and B<sub>2</sub>H<sub>6</sub> ( $m/z = 2, 26$ ) for the 2LiBH<sub>4</sub>-MgH<sub>2</sub>-Ni/C.

## Supporting Information

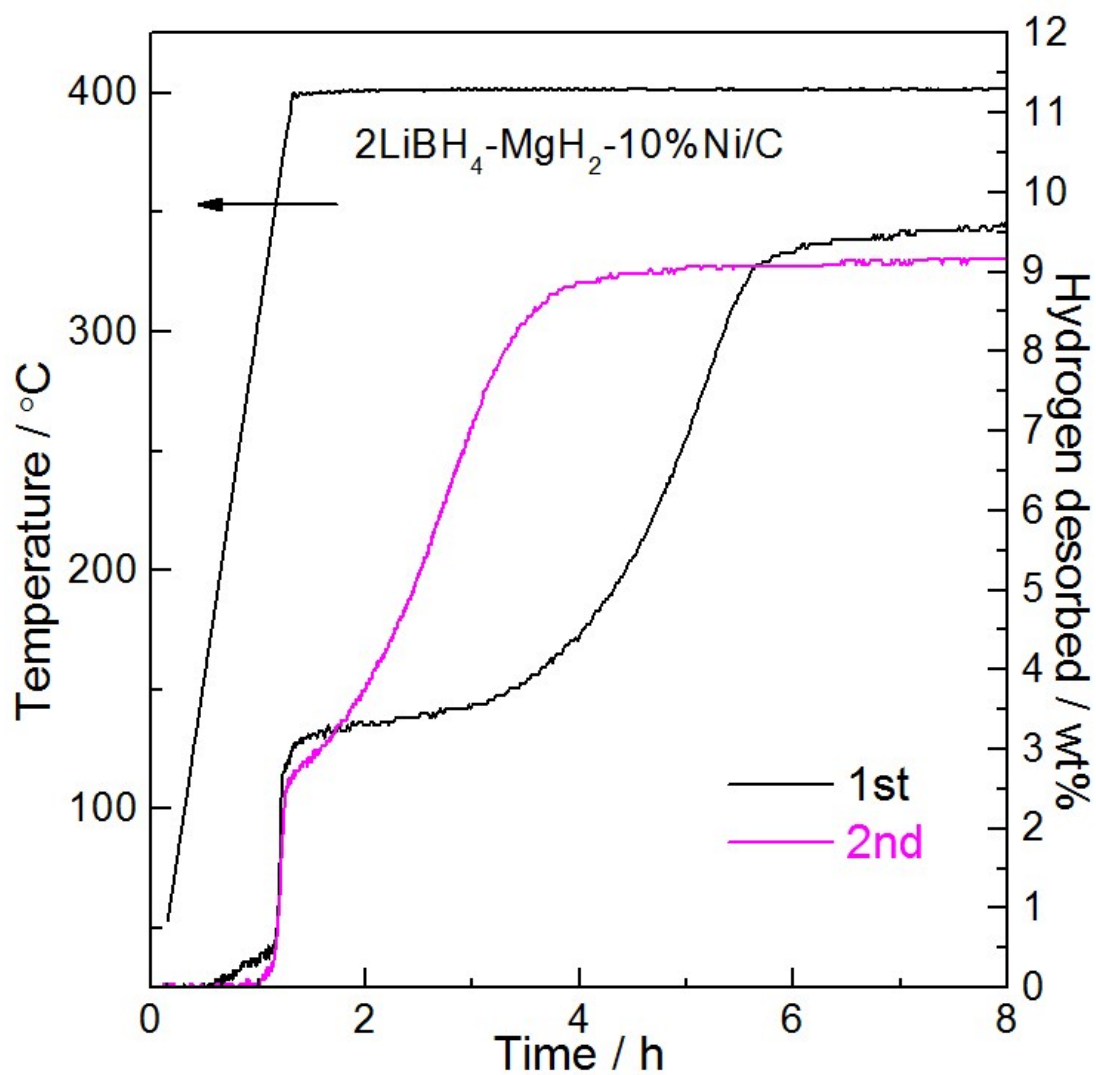

Figure S6 Cycling dehydrogenation curves of  $2\text{LiBH}_4\text{-MgH}_2$  doped with Ni/C.
